# Supplementary material
Source: publisher site journal article supplement (https://www.dovepress.com/article/310231)
Supplement: Supplementary file 1 [file get_supplementary_file.php]

**Supplementary materials**

**
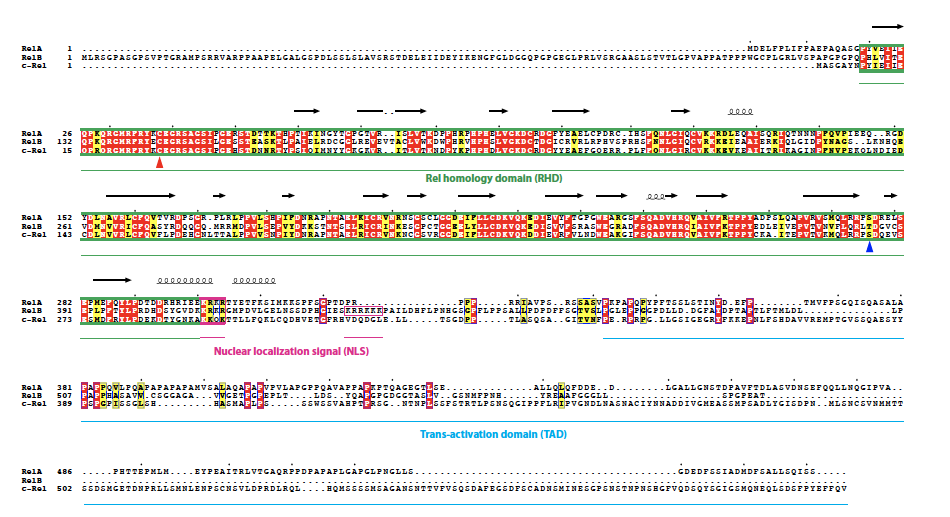
**

**Figure S1: Multiple sequence alignment of human RelA, RelB and c-Rel proteins.**

The Rel homology domain (RHD) comprising DNA binding/dimerization regions and nuclear localization signal (NLS) are boxed and underlined in green and pink, respectively, while transactivation domain (TAD) is underlined in light blue. The bipartite NLS of RelB is depicted. The positions of RelA C38 and S276 are indicated with red and blue arrowheads, respectively. Identical and similar amino acids are highlighted in red and yellow, respectively. Secondary structure elements are indicated at the top. The alignment was performed using Clustal Omega 1 and figure prepared in Espript 3 2

**
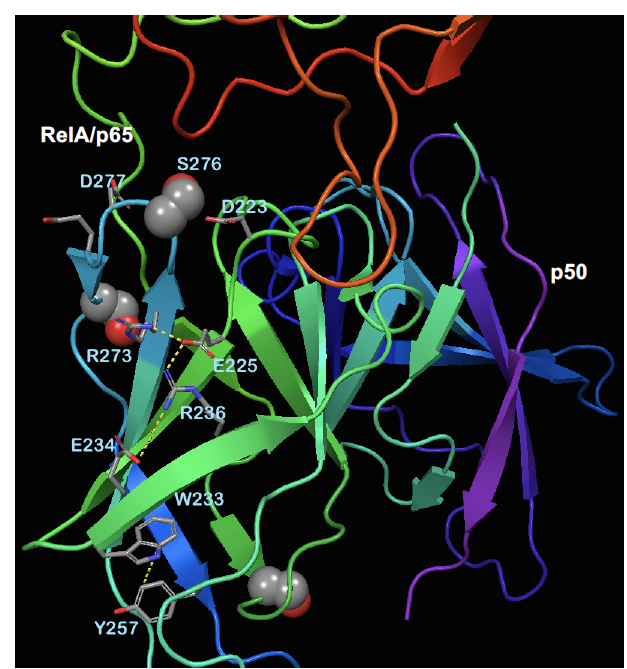
**

**Figure S2. Hydrogen bond network connecting drug-binding site to NLS.**  Three-dimensional structure of RelA/p65-p50 (PDB:1NFI) is shown at the closeup view. Network of hydrogen bonds are shown by dashed line from S276 to C-terminus that stabilize the NLS motif (not shown) in RelA/p65. The figure was produced using Maestro (Schrodinger, Inc) 3.

REFERENCES:

1. Sievers F, Wilm A, Dineen D, et al. Fast, scalable generation of high-quality protein multiple sequence alignments using Clustal Omega. *Mol Syst Biol.* 2011;7:539.

2. Robert X, Gouet P. Deciphering key features in protein structures with the new ENDscript server. *Nucleic Acids Res.* 2014;42(Web Server issue):W320-324.

3. Morin A, Eisenbraun B, Key J, et al. Collaboration gets the most out of software. *eLife.* 2013;2:e01456.
